# Supplementary material
Source: PubMed Central journal article supplement (PMC7722989)

Figure 1

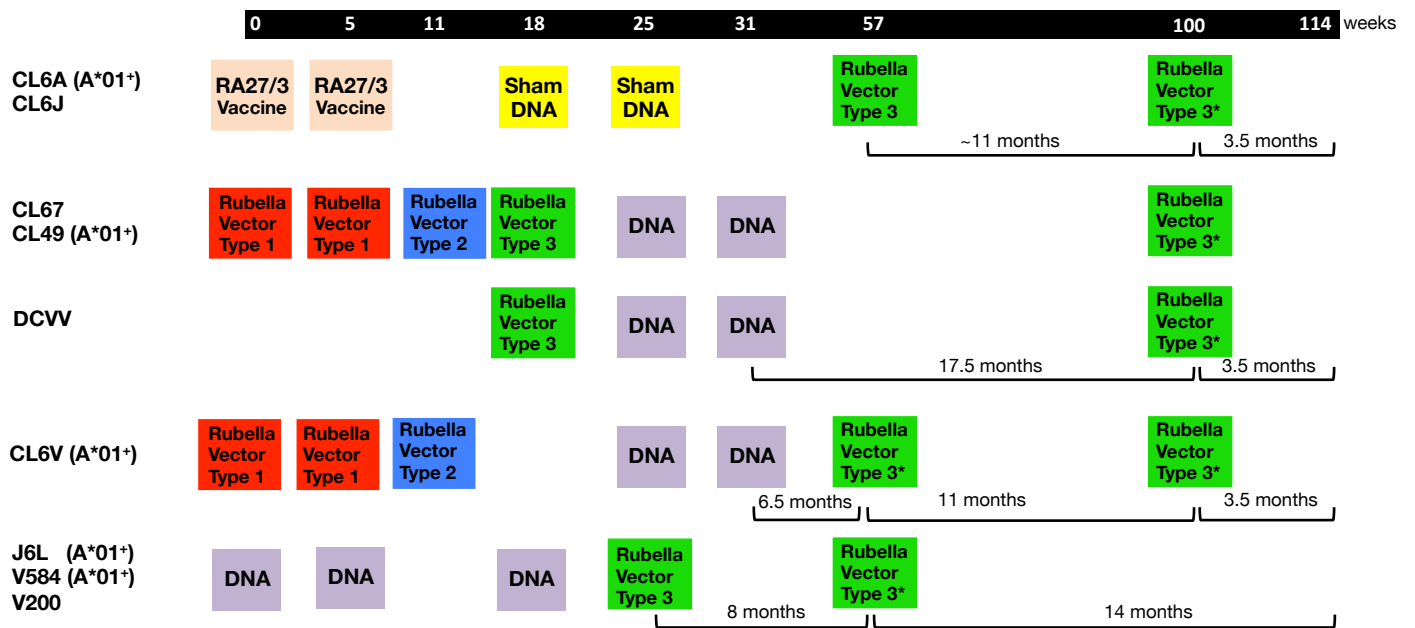

Figure 2

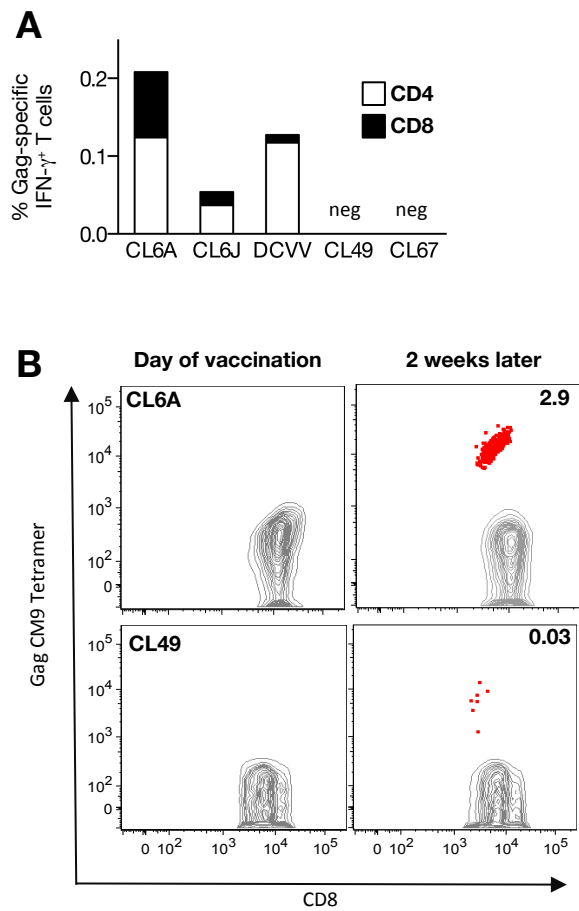

Figure 3A&B

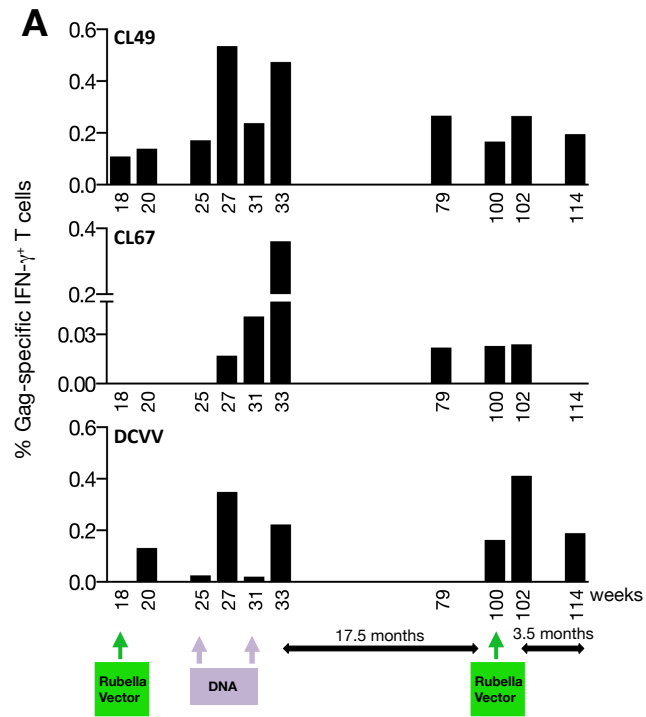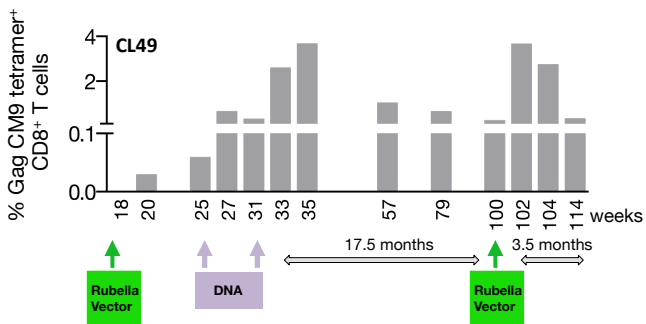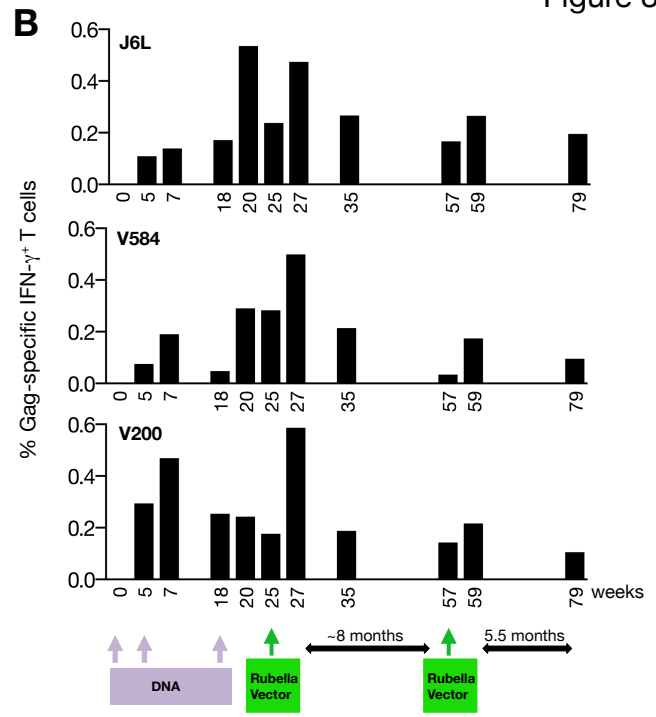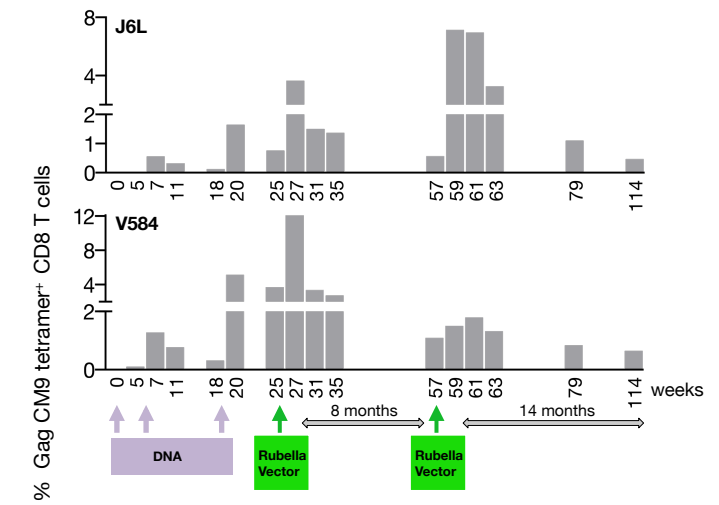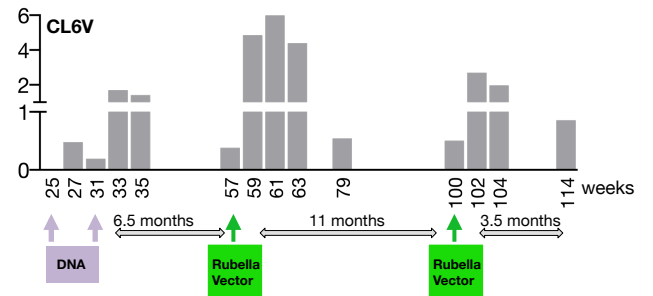

Figure 3C-E

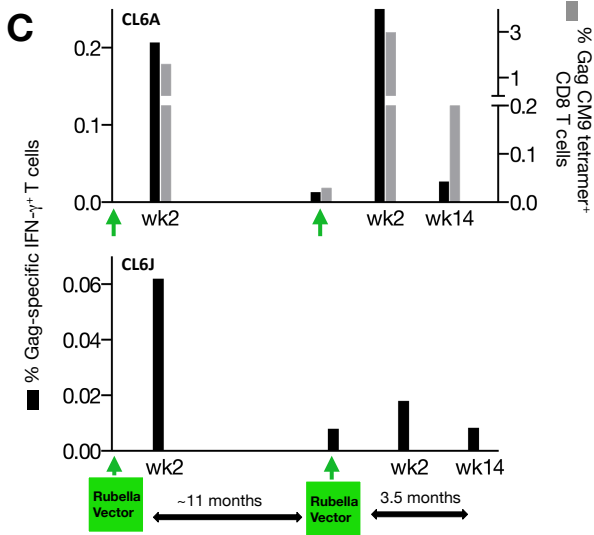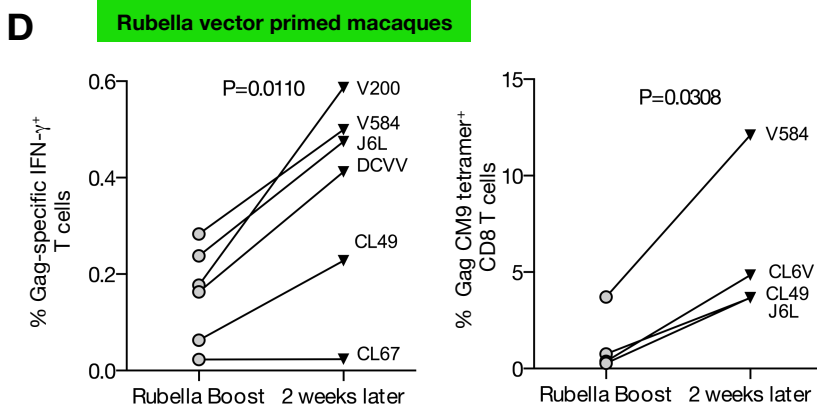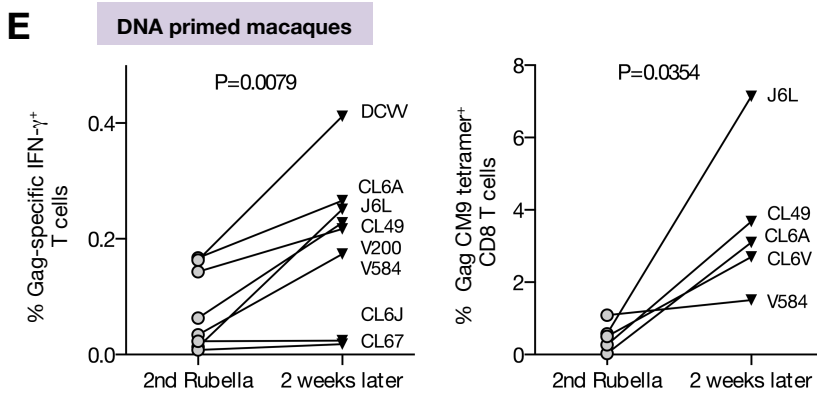

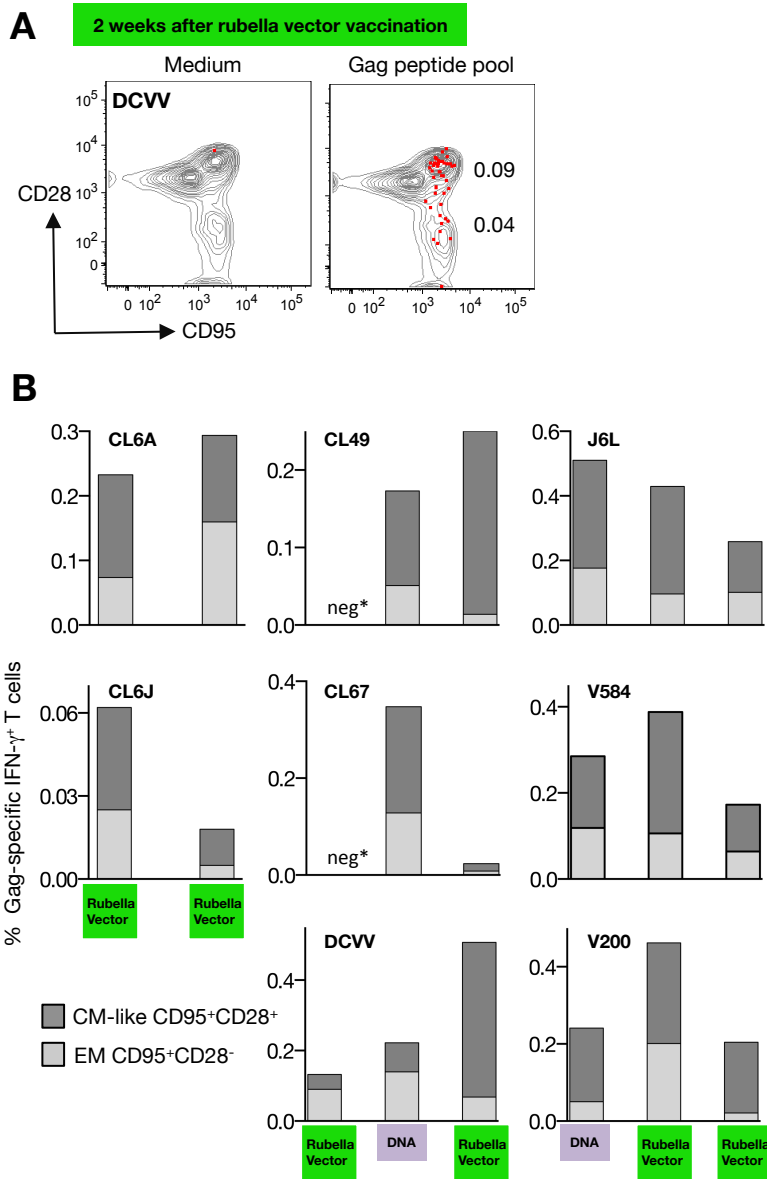

Figure 5

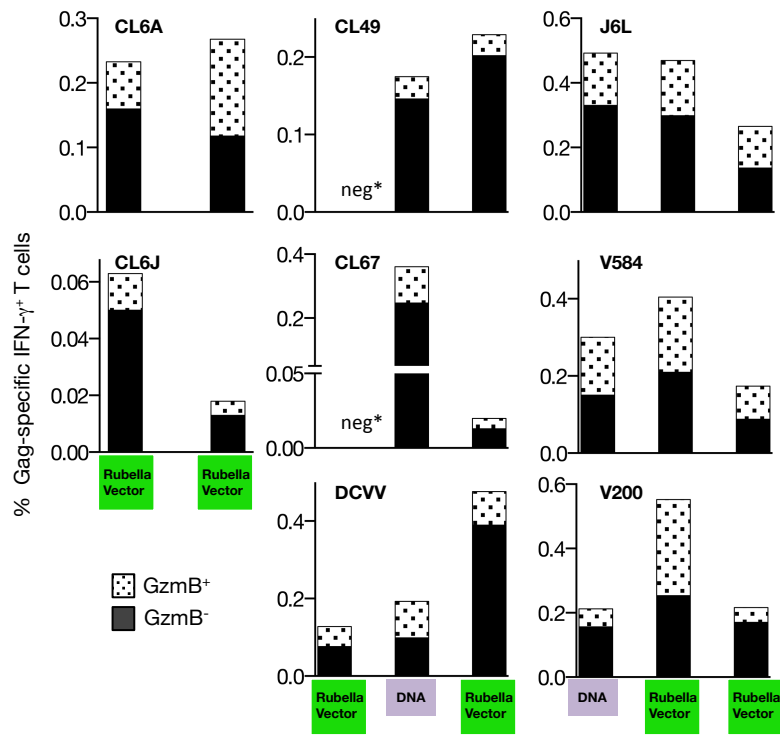

Supplement: NIHMS674533-supplement-1.pdf [file NIHMS674533-supplement-1.pdf]
